# Supplementary material for: Assessment of Contemporary Antarctic GIA Models Using High-Precision GPS Time Series
Source: MDPI journal article supplement (doi:10.3390/rs14051070), 2022-02-22
Supplement: s1 [file s1]

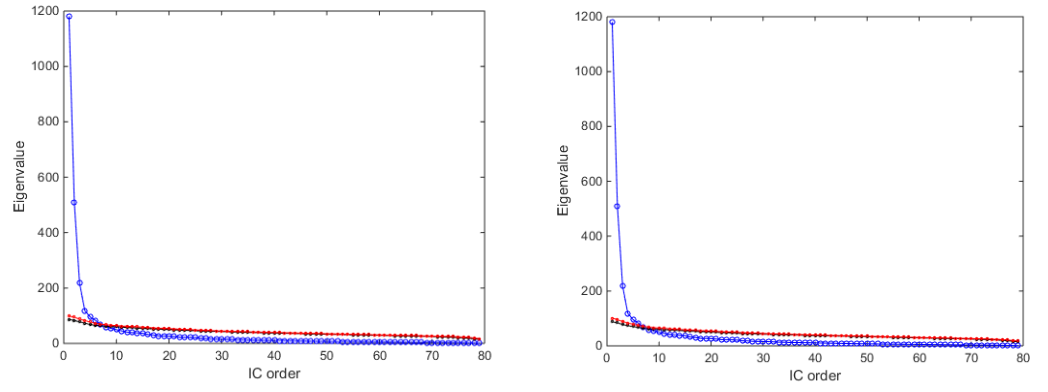

**Figure S1.** The PA test results of the ICs (the **left** panel shows the results without colored noise, and the **right** panel shows the results with colored noise; the blue line is the GPS data, and the black and red lines are the maximum and minimum values of the simulation results, respectively).

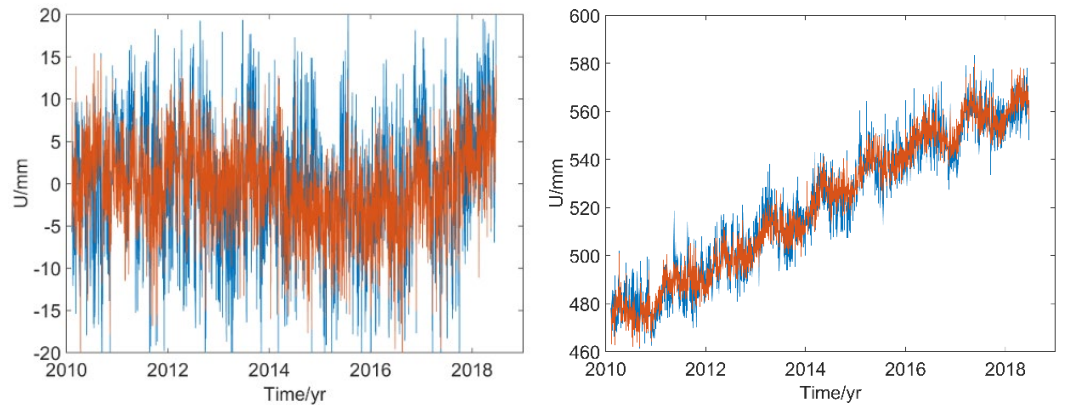

**Figure S2.** The residual time series (**left**) and raw time series (**right**) at station GMEZ before and after regional filtering by performing ICA (the blue lines are the raw time series, and the orange lines are the filtered time series).
