# Supplementary material for: Assessment of Contemporary Antarctic GIA Models Using High-Precision GPS Time Series
Source: MDPI journal article supplement (doi:10.3390/rs14051070), 2022-02-22
Supplement: s1 [file s1]

Archive with 2 entries (2 files):
- remotesensing-1585662-supplementary/Supplementary Materials.pdf
- remotesensing-1585662-supplementary/Table S1.xlsx
