# Supplementary material for: Assessment of Contemporary Antarctic GIA Models Using High-Precision GPS Time Series
Source: MDPI journal article supplement (doi:10.3390/rs14051070), 2022-02-22
Supplement: s1 [file s1 › remotesensing-1585662-supplementary/Table S1.xlsx]

## Sheet: GPS station 
Sub-regions	Num	Stations	lon	lat	GPS（raw）	noise model	GPS(noise+ica)	time span	elastic	ICE_6G	ICE_5G	WANG	W12a	Geruo	IJ05-R2	Paulson
	9	CAS1	110.52	-66.28	2.03967	WN+PL	1.9	2010-2018	0.205188	1.10284	0.833837	0.479233	1.91401	0.620475	0.416626	-0.0782126
	17	DUM1	140	-66.67	0.476715	WN+FN	0.6	2010-2017	-0.202858	0.477123	-0.472599	3.18271	1.12373	-0.589906	1.2513	-0.040048
	38	MAW1	62.87	-67.6	0.0522461	WN+PL	-0.1	2010-2018	-0.872301	0.459261	-0.645701	5.43003	0.721219	-0.731947	0.447205	1.85354
	65	SYOG	39.58	-69.01	0.965612	WN+PL	1.3	2010-2018	-1.2654	1.12195	-0.819832	0.641332	0.951057	-0.827906	0.43907	0.299867
East Antarctic	69	VESL	-2.84	-71.67	0.333229	WN+PL	1	2010-2018	-1.04563	1.95745	-1.19365	1.24559	1.44651	-1.14122	0.336042	0.19152
	70	VL01	169.725	-72.45	-1.37217	WN+PL	-1.2	2010-2018	0.305845	0.318668	0.425399	1.36411	0.85637	0.399312	-0.291075	0.481216
	71	VL12	163.727	-72.274	-1.28293	WN+PL	-1.3	2012-2018	0.496155	1.05286	-0.273799	1.77787	1.33525	-0.193869	0.0365141	1.14134
	72	VL30	162.525	-70.599	-1.96403	WN+FN	-1.6	2012-2018	0.359739	0.702196	-0.824331	1.35228	1.14527	-0.855948	0.219545	0.640389
Filcher-Ronne Ice Shelves	13	CRDI	-53.2	-82.86	3.09565	WN+PL	3.3	2010-2018	0.271399	4.14327	1.11697	10.216	6.88623	1.10829	1.71197	7.26202
	26	HAAG	-78.29	-77.04	5.57797	WN+PL	5.8	2010-2018	0.452981	8.5173	0.366519	4.29762	5.54955	0.455697	4.34114	3.87993
	29	HOWN	-86.77	-77.53	2.65245	WN+PL	2.9	2010-2018	1.15728	3.73083	0.597657	2.88344	5.41136	0.720775	5.11826	2.78123
	76	WILN	-80.56	-80.04	4.62683	WN+PL	4.9	2010-2018	0.602261	5	0.0935697	6.83586	7.76822	0.192679	4.59485	5.56755
	79	WWAY	-28.4027	-81.577	5.64754	WN+RW+GGM	6.8	2014-2018	-0.208803	0.437479	1.7643	4.90708	-3.38427	1.64607	1.19186	3.78175
South Antarctic Peninsula	23	FOS1	-68.321	-71.313	0.700054	WN+PL	0.3	2010-2018	1.94051	3.98958	1.72948	9.09911	0.505976	1.78064	2.9586	5.6911
	25	GMEZ	-68.536	-73.885	5.23164	WN+PL	5.4	2010-2018	0.655931	5.459	1.25885	7.30154	-0.303635	1.34447	3.89389	4.97992
	33	JNSN	-66.102	-73.076	5.36039	WN+PL	5	2010-2018	0.841217	4.82156	1.30442	7.77102	-1.01252	1.38839	3.69258	5.22182
	34	LNTK	-73.903	-74.835	4.42466	WN+FN	4.2	2010-2018	0.747554	6.54577	1.2526	5.73797	2.48042	1.32217	3.99335	4.12789
	44	MKIB	-65.603	-75.276	6.23964	WN+FN	6.2	2010-2018	0.156845	7.71618	0.917499	6.36296	0.503353	1.0122	2.6733	4.16485
	64	SUGG	-72.18	-75.28	4.65181	WN+FN	4.7	2010-2018	0.569062	7.13316	1.09954	5.86987	2.23556	1.17176	3.83893	4.33706
	68	TRVE	-67.555	-69.989	3.49839	WN+PL	3.5	2010-2018	1.57511	3.63745	1.74984	9.1036	0.817645	1.8139	2.20321	4.96165
	77	WLCH	-63.82	-70.729	0.40337	WN+PL	0.5	2010-2018	1.13049	3.79971	1.76679	8.87462	-0.35182	1.82401	3.02821	4.86178
North Antarctic Peninsula	8	CAPF	-60.56	-66.01	3.67851	WN+PL	4.1	2010-2018	2.0281	3.3279	-0.409068	8.10451	2.34924	-0.109452	0.416921	1.90675
	18	DUPT	-62.82	-64.8	11.4394	WN+RW+GGM	10.9	2010-2018	2.76328	3.0568	-1.18161	6.43087	1.94098	-0.868153	0.196237	1.91791
	22	FONP	-61.65	-65.25	14.5404	WN+PL	15	2010-2015	3.17622	3.46784	-0.951283	7.35235	2.07654	-0.629675	0.332462	2.03268
	30	HUGO	-65.67	-64.96	0.512698	WN+FN	0.3	2010-2018	1.22938	2.0392	-1.164	4.6677	1.96768	-0.881466	-0.00117968	1.4467
	39	MBIO	-56.623	-64.24	3.37793	WN+PL	3.8	2013-2018	1.41589	1.30598	-1.18477	4.22825	1.40907	-0.892347	-0.220237	1.41641
	45	OHI2	-58.1	-63.62	0.26495	WN+PL	1.1	2010-2018	2.08562	1.70976	-1.35782	4.58747	1.26121	-1.06637	-0.175627	1.69706
	46	OHI3	-57.9	-63.62	1.76969	WN+PL	1.9	2010-2018	2.08562	1.70976	-1.35782	4.58747	1.26121	-1.06637	-0.175627	1.69706
	47	PAL2	-64.05	-64.78	6.00446	WN+PL	6.2	2010-2018	2.01592	2.68796	-1.21032	5.7229	1.93903	-0.902301	0.115315	1.73506
	48	PALM	-64.25	-64.78	6.13436	WN+PL	6.2	2010-2018	2.01592	2.68796	-1.21032	5.7229	1.93903	-0.902301	0.115315	1.73506
	49	PALV	-64.45	-64.78	6.79264	WN+PL	6.9	2010-2017	2.01592	2.68796	-1.21032	5.7229	1.93903	-0.902301	0.115315	1.73506
	54	PRPT	-65.339	-66.007	1.70638	WN+PL	1.6	2014-2018	2.11774	3.16705	-0.580572	6.32584	1.97732	-0.318072	0.360074	1.95541
	58	ROBN	-59.44	-65.25	6.9241	WN+PL	6.9	2010-2017	2.35098	2.69163	-0.867534	7.0146	2.0999	-0.555933	0.160316	1.80758
	59	ROTH	-68.13	-67.57	4.67772	WN+PL	7.2	2010-2018	1.26249	2.3737	0.45302	6.03467	2.12169	0.591725	0.331859	2.43808
	62	SPGT	-61.0537	-64.295	10.9035	WN+PL	10.9	2013-2018	2.85349	2.72125	-1.31487	6.20707	1.77213	-0.998453	0.0701074	1.94899
	73	VNAD	-64.25	-65.25	5.46051	WN+PL	5.6	2010-2017	2.28868	3.0794	-1.01358	6.19749	1.97982	-0.706685	0.247625	1.85325
Ross Ice Shelves	1	ABBZ	166.909	-77.457	-0.550687	WN+PL	-0.1	2010-2018	-0.0103528	1.17287	1.86637	2.30141	3.8586	1.83465	-0.224324	1.07968
	5	BRIP	158.47	-75.8	1.17813	WN+PL	1.1	2010-2018	0.02108	1.64179	1.20072	0.655226	0.923252	1.62781	-0.197874	1.353
	6	BUMS	174.499	-85.961	0.0203307	WN+FN	0.6	2014-2018	0.227066	1.66946	3.50905	6.33155	2.85085	3.40026	0.0774999	4.28777
	7	BURI	155.89	-79.15	1.01033	WN+PL	1.2	2010-2018	0.0243716	1.80706	3.23295	1.45717	2.10532	3.15288	-0.0463559	1.1873
	11	COTE	162	-77.81	0.943152	WN+PL	1	2010-2018	-0.00667684	1.9496	2.44487	1.76073	3.28121	2.42649	-0.159513	1.28067
	12	CRAR	166.67	-77.84	1.48069	WN+PL	1	2010-2018	-0.00669031	1.48008	2.03457	2.26565	4.17952	1.97217	-0.128292	1.07497
	14	DAV1	77.97	-68.58	-0.896227	WN+PL	-1.2	2011-2017	-0.641943	0.126439	-0.829705	0.694502	0.740967	-0.878878	0.626275	0.432777
	16	DEVI	161.98	-81.48	1.97807	WN+PL	2	2010-2018	0.481935	3.7735	3.12014	3.18177	4.78492	2.95214	1.1216	2.74461
	19	FALL	-143.63	-85.31	5.19693	WN+PL	5.4	2010-2018	0.05049	5.10606	2.38875	9.73533	4.5199	2.39052	1.24726	6.92049
	20	FIE0	168.42	-76.14	-0.257482	WN+PL	0.2	2011-2015	0.00213817	0.403127	1.37902	2.35973	2.79073	1.38481	-0.390169	1.03308
	21	FLM5	160.27	-77.53	0.9881	WN+PL	1.1	2010-2018	-0.0144522	1.96571	2.4292	1.40006	2.58437	2.46336	-0.20043	1.30049
	24	FTP4	162.56	-78.93	1.13698	WN+PL	1.1	2010-2018	0.033212	2.42297	2.82005	2.0747	4.28694	2.68396	0.137823	1.32283
	27	HOOZ	166.93	-77.53	0.553382	WN+PL	-0.3	2010-2014	-0.0099873	1.2073	1.88996	2.29779	3.92707	1.85287	-0.208984	1.07335
	31	IGGY	156.25	-83.31	0.560419	WN+FN	0.6	2010-2017	0.252214	2.18838	3.36326	3.7481	2.48723	3.23376	0.421775	2.91036
	36	LWN0	152.73	-81.35	1.69108	WN+PL	1.7	2010-2018	0.156459	2.15881	3.44698	2.47717	1.45093	3.38089	0.273867	1.74546
	37	MACG	167.25	-77.53	0.197445	WN+FN	0.2	2010-2015	-0.00990539	1.15348	1.85965	2.28944	3.95126	1.81753	-0.209276	1.03951
	41	MCM4	166.87	-77.84	0.364991	WN+PL	-0.4	2010-2018	-0.00669031	1.45351	2.01525	2.27613	4.20236	1.9517	-0.127143	1.05932
	42	MCMD	166.67	-77.84	0.187148	WN+PL	0.1	2010-2018	-0.00669031	1.48008	2.03457	2.26565	4.17952	1.97217	-0.128292	1.07497
	43	MIN0	167.16	-78.65	0.594709	WN+PL	0.6	2010-2018	0.0140619	2.08942	2.2988	2.38017	4.98674	2.18249	0.179194	1.23047
	50	PATN	-155.02	-78.03	2.83702	WN+PL	2.9	2010-2017	1.0404	4.04632	0.0766038	6.0574	3.25767	0.103783	1.63434	4.7106
	52	PHIG	167.05	-77.525	-2.5467	WN+RW+GGM	-2.4	2013-2018	-0.00998267	1.18331	1.87669	2.29865	3.93318	1.83875	-0.210435	1.06168
	55	RAMG	178.05	-84.34	1.42449	WN+FN	1.4	2010-2018	0.240409	4.12117	3.31654	7.59873	6.21555	3.21803	1.10456	6.3315
	57	ROB4	163.19	-77.03	1.09246	WN+PL	1.1	2010-2018	-0.00840072	1.77164	1.99553	1.95225	2.93294	2.08488	-0.262399	1.39393
	60	SCTB	166.76	-77.85	-0.533111	WN+PL	-0.3	2010-2018	-0.0064364	1.47562	2.02974	2.2697	4.19884	1.96596	-0.125161	1.06724
	74	WHN0	154.22	-79.846	-0.412747	WN+PL	0.3	2010-2017	0.0715101	1.89959	3.38225	1.74904	1.69905	3.31833	0.0345291	1.2883
Amundsen Sea Embayment	2	BACK	-102.48	-74.43	15.3614	WN+FN	15.8	2011-2018	4.63817	6.77447	0.628048	2.30926	5.45771	0.74148	0.954613	1.05478
	4	BERP	-111.88	-74.55	27.107	WN+PL	27.3	2011-2018	5.53335	5.5857	1.36512	2.03478	3.97329	1.44001	0.650676	0.75206
	15	DAVE	77.973	-68.577	-2.13209	WN+PL	-2.4	2010-2018	-0.641731	0.125452	-0.829559	0.692447	0.740871	-0.878712	0.624655	0.431568
	32	INMN	-98.8805	-74.8209	32.208	WN+FN	32.6	2011-2018	6.9053	6.97752	0.706924	2.54082	5.4186	0.798518	1.73517	1.34772
	35	LPLY	-90.3	-73.11	5.90242	WN+FN	6.6	2013-2018	2.14844	6.17683	0.593078	2.13494	4.53027	0.662896	1.44883	0.63075
	66	THU4	-97.56	-72.53	-2.03908	WN+PL	-1.8	2011-2018	0.861787	5.89879	0.512031	1.76882	4.08322	0.603373	0.159094	0.335086
	67	TOMO	-114.39	-75.48	51.6517	WN+FN	52.6	2012-2018	7.25902	5.29696	1.77781	2.37307	3.44619	1.79515	1.28675	1.27522
	3	BENN	-116.46	-84.79	9.55985	WN+PL	9.9	2010-2018	0.213359	6.28288	2.14407	8.38191	2.63737	2.17241	1.01681	5.54255
	10	CLRK	-141.87	-77.34	2.28625	WN+PL	2.5	2010-2018	1.6449	3.09806	0.157801	4.57083	2.42542	0.198733	2.00381	3.69169
	28	HOWE	-149.43	-87.42	-0.450967	WN+FN	-0.3	2010-2018	0.234879	0.60069	3.83611	5.44083	1.49453	3.63108	-0.0487963	3.3442
	40	MCAR	167.07	-77.84	1.92056	WN+PL	2.1	2010-2018	-0.000681595	2.00085	0.177764	3.05507	1.78121	0.215188	1.22828	1.67582
	51	PECE	-68.56	-85.61	0.0771892	WN+FN	0.8	2010-2018	0.347638	0.727646	2.79852	7.40545	5.37972	2.75351	1.00012	4.35281
	53	PIRT	-85.1426	-81.1032	1.6506	WN+PL	1.8	2013-2018	0.625315	0.966315	0.654301	6.20478	8.1246	0.742617	4.20089	5.13315
	56	RMBO	-66.3938	-83.8732	2.35895	WN+PL	2.6	2014-2018	0.451407	3.05925	1.3237	10.0388	8.81807	1.35848	1.91137	6.53817
	61	SDLY	-125.97	-77.14	-0.936868	WN+PL	-0.8	2010-2018	2.8241	2.65458	1.16556	3.69489	1.44262	1.18141	1.19256	2.76596
	63	STEW	-86.2473	-84.187	0.300899	WN+FN	0.7	2014-2018	0.535094	1.75461	1.99878	6.19498	7.28415	2.06083	1.3736	4.87661
	75	WHTM	-104.39	-82.68	4.20267	WN+RW+GGM	4.5	2010-2018	0.097105	4.39968	1.90284	5.72691	3.81324	1.94475	0.9329	5.06336
	78	WLCT	-87.3925	-85.3692	-0.378709	WN+FN	-0.2	2014-2018	0.444151	1.63898	2.95857	5.77392	5.07269	2.94569	0.682773	4.04269

## Sheet: GIA model information
GIA models	Author	Ice Model	Earth Model	Data	Grid	Scope of application
ICE-5G(VM2)	Peltier,2004	ICE-5G	VM2_L90	GPS,RSL,VLBI	1°×1°	global
ICE-6G-C(VM5a)	Peltier et al.,2014	ICE-6G-C	VM5a	GPS,RSL,GRACE	1°×1°	global
Pauson07	Paulson et al.,2007	ICE-5G	Four layer viscosity model approximating vm2	GRACE,RSL	1°×1°	global
Geruo13	Geruo et al.,2013	ICE-5G	3D, finite element, compressible earth model	GRACE,RSL,Altimeter	1°×1°	global
WANG	Wang et al.,2008	ICE-4G	RF3L20(β=0.4)	GPS,GRACE,RSL,Altimeter	1°×1°	global
IJ05_R2	Ivins et al.,2013	IJ05_R2	Simple compressible earth model	GPS,RSL	0.5°×0.5°	Antarctica
W12a	Whitehouse et al.,2012	W12a	Compressible, spherically symmetric, self attractive Maxwell viscoelastic	GPS,RSL	0.5°×0.5°	Antarctica
